# Supplementary material for: miR-148a-3p Mediates Notch Signaling to Promote the Differentiation and M1 Activation of Macrophages
Source: PubMed Central journal article supplement (PMC5650608; doi:10.3389/fimmu.2017.01327), 2017-10-16
Supplement: Data_Sheet_1.pdf [file Data_Sheet_1.pdf]

*Supplementary Material*

**miR-148a-3p Mediates Notch Signaling to Promote the Differentiation and M1 Activation of Macrophages**

**Fei Huang, Jun-Long Zhao, Liang Wang, Chun-Chen Gao, Shi-Qian Liang, Dong-Jie An, Jian Bai, Yan Chen, Hua Han<sup>\*</sup>, Hong-Yan Qin<sup>\*</sup>**

**\* Correspondence:** Hua Han: [huahan@fmmu.edu.cn](mailto:huahan@fmmu.edu.cn); Hong-Yan Qin: [hyqin@fmmu.edu.cn](mailto:hyqin@fmmu.edu.cn)

**Table S1.** Primers and oligonucleotides used for PCR in this study.

| <b>Name</b>            | <b>Purpose</b> | <b>Sequence</b>                     |
|------------------------|----------------|-------------------------------------|
| Cre-F*                 | Genotyping     | 5'-CCGGTCGATGCAACGAGTGATGAGG        |
| Cre-R*                 | Genotyping     | 5'-GCCTCCAGCTTGCATGATCTCCGG         |
| RBP-J-F                | Genotyping     | 5'-GTTCTTAACCTGTTGGTCGGAACC         |
| RBP-J-WT-R             | Genotyping     | 5'-GCTTGAGGCTTGATGTTCTGTATTGC       |
| RBP-J-floxed-R         | Genotyping     | 5'-ACCGGTGGATGTGGAATGTGT            |
| NICD-F                 | Genotyping     | 5'-AAAGTCGCTCTGAGTTGTTAT            |
| NICD-WT-R              | Genotyping     | 5'-TAAGCCTGCCCAGAAGACTC             |
| NICD-floxed-R          | Genotyping     | 5'-GAAAGACCGCGAAGAGTTTG             |
| PTEN-F                 | RT-PCR         | 5'-ATCAAGAGGATGGATTCCG              |
| PTEN-R                 | RT-PCR         | 5'-GGCGGTGTCATAATGTCT               |
| PTEN mut1-F            | PCR            | 5'-CAATGGGCTGTCCGAGACTTAATA         |
| PTEN mut1-R            | PCR            | 5'-TATTAAGTCTCGGACAGCCCATTTG        |
| PTEN-mut2-F            | PCR            | 5'-AAATGCTACCGAGACAGGATACAC         |
| PTEN-mut2-R            | PCR            | 5'-GTGTATCCTGTCTCGGTAGCATTT         |
| PTEN 3'UTR-F           | PCR            | 5'-CGGAATTCGAAATCTGTACACCCCTTGTCTT  |
| PTEN 3'UTR-R           | PCR            | 5'-AACTGCAGCACCCACACAATGACAAGAATGAG |
| PTEN siRNA             | siRNA          | 5'-TCTTCAAGGGCAATTTGCTCATTAA        |
| iNOS-F                 | RT-PCR         | 5'-TCGACATCCGCAACGACTATC            |
| iNOS-R                 | RT-PCR         | 5'-CCAGGGCGTAGTTGTAGAAGAG           |
| IL-6-F                 | RT-PCR         | 5'-ATGGCCCATTACAAAGCCG              |
| IL-6-R                 | RT-PCR         | 5'-TTTCTGGAGTAGCAGCTCCTAA           |
| TNF- $\alpha$ -F       | RT-PCR         | 5'-TCGACATCCGCAACGACTATC            |
| TNF- $\alpha$ -R       | RT-PCR         | 5'-CCAGGGCGTAGTTGTAGAAGAG           |
| MR-F                   | RT-PCR         | 5'- AAACACAGACTGACCCTTCCC           |
| MR-R                   | RT-PCR         | 5'- GTTAGTGTACCGCACCCCTCC           |
| $\beta$ -actin         | RT-PCR         | 5'-CATCCGTAAAGACCTCTATGCCAAC        |
| $\beta$ -actin         | RT-PCR         | 5'-ATGGAGCCACCGATCCACA              |
| control mimics         | nucleotides    | 5'-UUUGUACUACACAAAAGUACUG           |
| control inhibitors     | nucleotides    | 5'-CAGUACUUUUGUGUAGUACAAA           |
| miR-148a-3p mimics     | nucleotides    | 5'-UCAGUGCACUACAGAACUUUGU           |
| miR-148a-3p inhibitors | nucleotides    | 5'-ACAAAGUUCUGUAGUGCACUGA           |

Note: F, Forward; R, Reverse.

FigS1

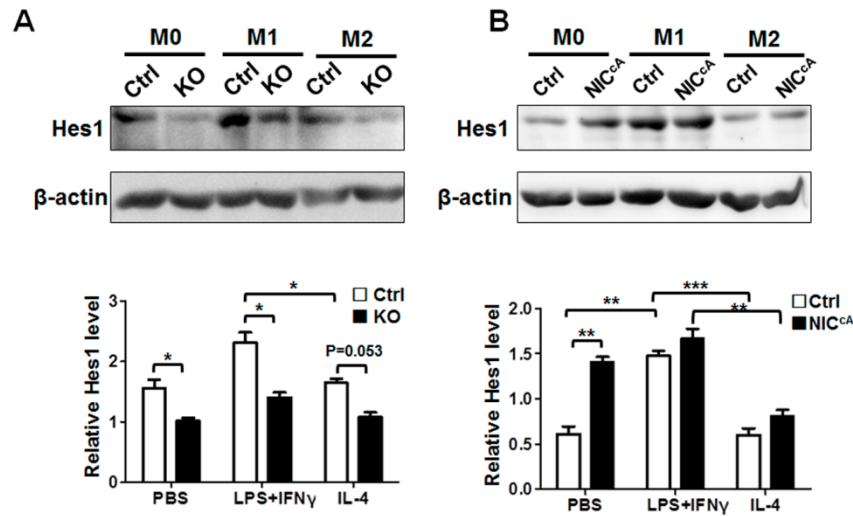

**Figure S1. The efficiency of Notch knockdown or activation in macrophages was detected. (A)** BMDMs from RBP-J<sup>CKO</sup> or control (Ctrl) mice were stimulated with PBS (M0), LPS+IFN- $\gamma$  (M1), or IL-4 (M2). The expression level of HES1, one downstream molecules of Notch signaling, was detected by Western blotting, using  $\beta$ -actin as a reference control and relative levels of HES1 compared quantitatively (n=3). **(B)** BMDMs were prepared from NIC<sup>cA</sup> or control (Ctrl) mice, and stimulated with PBS (M0), LPS+IFN- $\gamma$  (M1), or IL-4 (M2). The expression level of HES1 was detected by Western blotting, using  $\beta$ -actin as a reference control and relative levels of HES1 compared quantitatively (n=5). Bars, mean  $\pm$  SD; \* $P$  < 0.05; \*\* $P$  < 0.01; \*\*\* $P$  < 0.001; n.s, not significant.

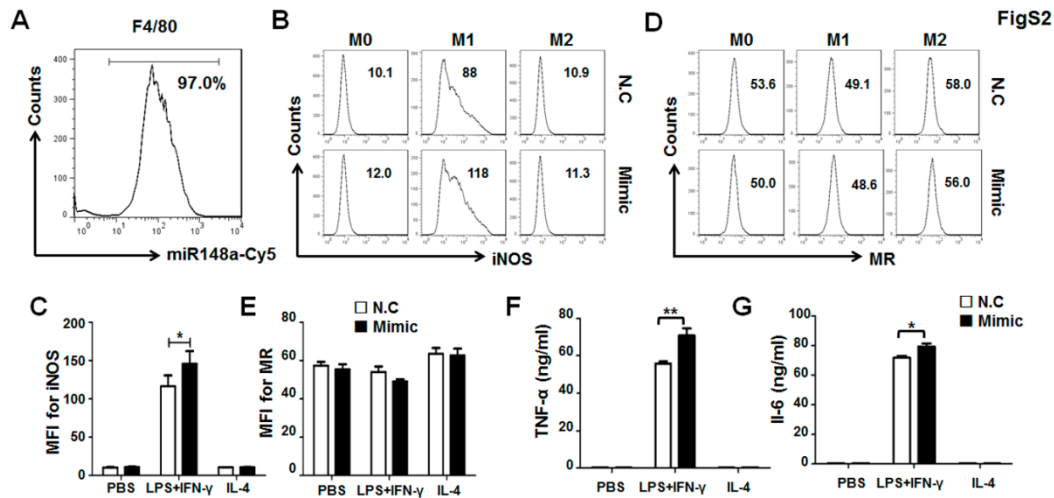

**Figure S2. miR-148a-3p can promote M1 macrophage polarization.** (A) The transfection efficiency of miR-148 in macrophages was detected by labeling miR-148a with Cy5 using FACS (n=3). (B, C) BMDMs were transfected with miR-148a-3p mimic or control (N.C). Cells were then polarized with PBS (M0), LPS+IFN-γ (M1), or IL-4 (M2) for 24 h. The expression level of M1 marker iNOS was analyzed using FACS intracellular staining (B), and then the mean fluorescent intensity (MFI) for iNOS was quantitatively compared (C)(n=3). (D, E) BMDMs were transfected with miR-148a-3p mimic or N.C. Cells were then polarized with PBS (M0), LPS+IFN-γ (M1), or IL-4 (M2) for 24 h. The expression level of M2 marker MR was analyzed using FACS intracellular staining (D), and then the mean fluorescent intensity (MFI) for MR was quantitatively compared (E)(n=3). (F, G) BMDMs were transfected with miR-148a-3p mimic or N.C. Cells were then polarized with PBS (M0), LPS+IFN-γ (M1), or IL-4 (M2) for 24 h. After that, the supernatant of cultured medium was collected and the expression level of M1 marker TNF-α (F) and IL-6 (G) was analyzed using ELISA (n=8). Bars, mean ± SD; \**P* < 0.05; \*\**P* < 0.01.

**FigS3**

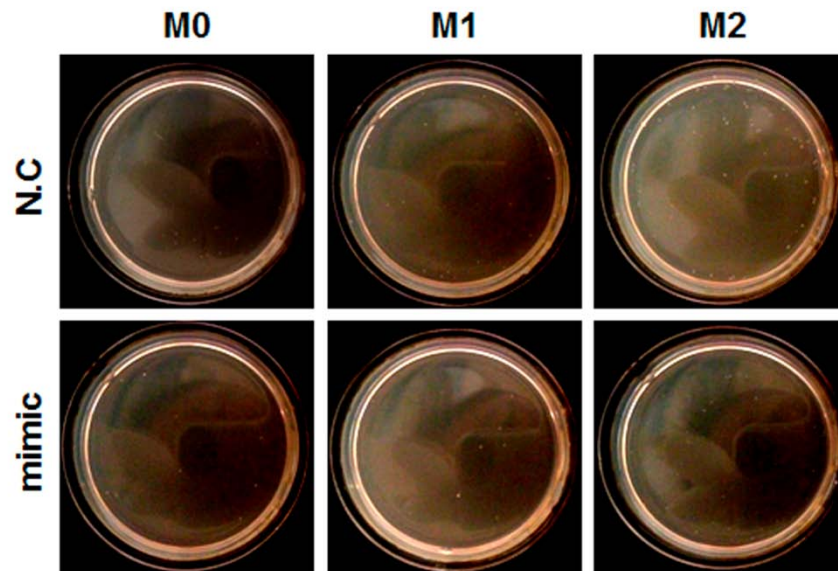

**Figure S3. miR-148a-3p enhances bactericidal activity of macrophages.** BMDMs derived from normal mice were transfected with miR-148a-3p mimic or control (N.C) and stimulated with PBS (M0), LPS+IFN- $\gamma$  (M1), or IL-4 (M2). Then macrophages ( $1 \times 10^6$ ) were co-cultured with *E. coli* ( $1 \times 10^7$  CFU) that had been transformed with an *EGFP*-expressing vector for 2 h. Macrophages that had engulfed *EGFP*<sup>+</sup> bacteria were incubated for a further 6 h. Cells were then lysed and plated on ampicillin-containing agar plates to observe the growth of bacterial colonies (n=3).

FigS4

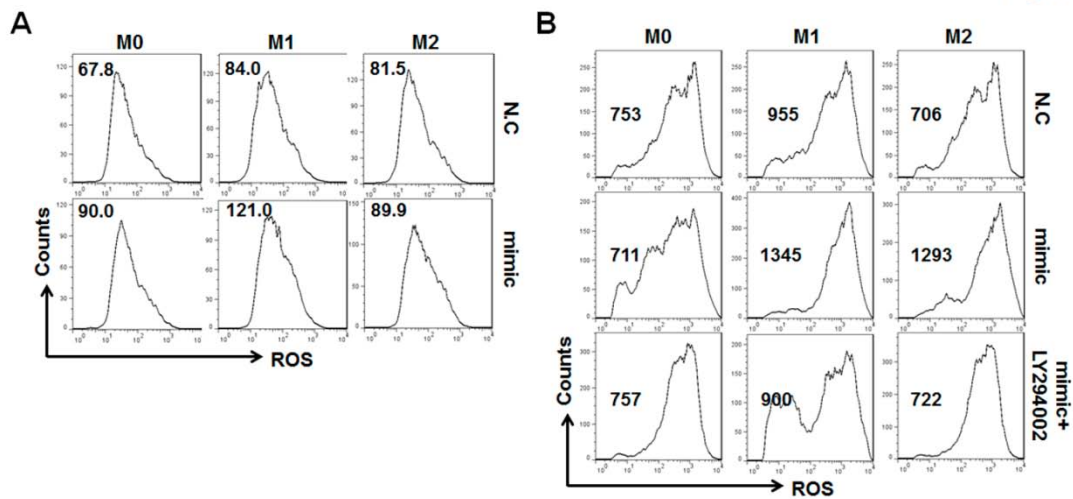

**Figure S4. miR-148a-3p increases ROS level in macrophages in an AKT-dependent manner. (A)** BMDMs were transfected with miR-148a-3p mimic or control (N.C), and then polarized with PBS (M0), LPS+IFN- $\gamma$  (M1), or IL-4 (M2). ROS levels were determined by FACS (n=3). **(B)** BMDMs were transfected with miR-148a-3p mimic or control (N.C), and then polarized with PBS (M0), LPS+IFN- $\gamma$  (M1), or IL-4 (M2), in the presence of LY294002. ROS levels were determined by FACS.

FigS5

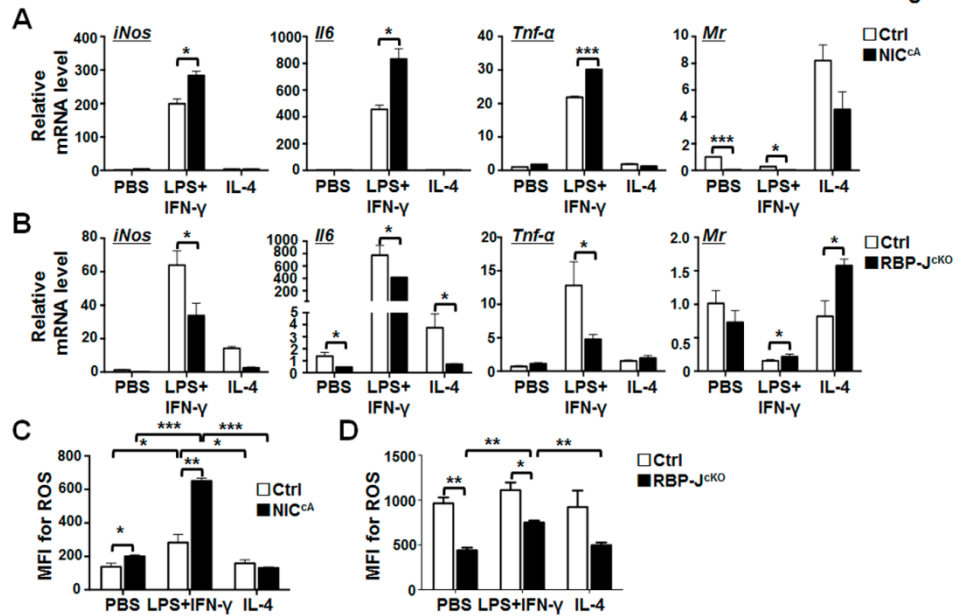

**Figure S5. Notch signaling promotes M1 and attenuates M2 polarization of macrophages. (A, B)**

BMDMs from mice with different genotypes were stimulated with PBS (M0), LPS+IFN- $\gamma$  (M1), or IL-4 (M2). mRNA levels of *iNos*, *Il6*, *Tnf- $\alpha$* , and *Mr* were determined by qRT-PCR, using  $\beta$ -actin as a reference control (n=3). (C, D) BMDMs from mice with different genotypes were stimulated with PBS (M0), LPS+IFN- $\gamma$  (M1), or IL-4 (M2). ROS levels were determined by FACS and quantified by MFI (n = 3). Bars, mean  $\pm$  SD; \* $P$  < 0.05; \*\* $P$  < 0.01; \*\*\* $P$  < 0.001.
